# Supplementary material for: BRD4 regulates adiponectin gene induction by recruiting the P-TEFb complex to the transcribed region of the gene
Source: PubMed Central journal article supplement (PMC5607256; doi:10.1038/s41598-017-12342-2), 2017-09-20
Supplement: 41598_2017_12342_MOESM1_ESM.pdf [file 41598_2017_12342_MOESM1_ESM.pdf]

## **Supplementary materials**

Manuscript title: BRD4 regulates adiponectin gene induction by recruiting the P-TEFb complex to the transcribed region of the gene

Author name: Naoko Sakurai, Yuko Imamochi, Takuya Inoue, Natsuyo Hariya, Musashi Kawamura, Masami Yamada, Anup Dey, Akira Nishiyama, Takeo Kubota, Keiko Ozato, Toshinao Goda Kazuki Mochizuki

### List of Supplementary materials

S1 Table

S2 Table

S1 Fig

S2 Fig

S3 Fig

S1 Table. Primer sets used for real time RT-PCR.

| Gene          |            | Sequence                      |
|---------------|------------|-------------------------------|
| 18S rRNA      | sense      | 5'-GGACACGGACAGGATTGACAGA-3'  |
|               | anti-sense | 5'-TAGCATGCCAGAGTCTCGTTTCG-3' |
| 12S rRNA      | sense      | 5'-AATCGATAAACCCCGCTCTAC-3'   |
|               | anti-sense | 5'-TTCATTGGCTACACCTTGACC-3'   |
| <i>AdipoQ</i> | sense      | 5'-AGGCCGTTCTCTTCACCTACGA-3'  |
|               | anti-sense | 5'-GACTTGGTCTCCCACCTCCAGA-3'  |
| <i>Albp</i>   | sense      | 5'-CAAGCCCAACATGATCATCAGC-3'  |
|               | anti-sense | 5'-CACGCCCAGTTTGAAGGAAATC-3'  |
| <i>Brd4</i>   | sense      | 5'-AATCATTCGCAGCGAGCCTTT-3'   |
|               | anti-sense | 5'-TTGGGTGCCACTGGTGTTTTT-3'   |
| <i>Glut4</i>  | sense      | 5'-CTACCCTGTGGCCACTGCTTCT-3'  |
|               | anti-sense | 5'-GGTATCTGGGGCGCGCAGGACA-3'  |
| <i>Fas</i>    | sense      | 5'-GTGTGGACATGGTCACAGATG-3'   |
|               | anti-sense | 5'-GACCGCTTGGGTAATCCATA-3'    |
| <i>Acca</i>   | sense      | 5'-TTACATCCGCTTGGCTGAG-3'     |
|               | anti-sense | 5'-TCCTCCCGCTTCTTCAACT-3'     |
| <i>Accβ</i>   | sense      | 5'-GCGAAAACCCAGATGAGG-3'      |
|               | anti-sense | 5'-GTTCTTGTGCTGCGGAAG-3'      |
| <i>Dgat</i>   | sense      | 5'-GGTAAACCTGGCCACAATCA-3'    |
|               | anti-sense | 5'-AGCAAACACGGAACCCACT-3'     |
| <i>Lpl</i>    | sense      | 5'-TCAGAGCCAAGAGAAGCAGCAA-3'  |
|               | anti-sense | 5'-TTGTGTTGCTTGCCATCCTCA-3'   |
| <i>Hsl</i>    | sense      | 5'-GTGGCGAAAAGGCAAGATCAA-3'   |
|               | anti-sense | 5'-TCATCGTGCGTAAATCCATGC-3'   |
| <i>Aco</i>    | sense      | 5'-TCATCGTGCGTAAATCCATGC-3'   |
|               | anti-sense | 5'-AAATCCCAAGCAGCCCAATTC-3'   |
| <i>Pparγ1</i> | sense      | 5'-GAGGACGCGGAAGAAGAGACCT-3'  |
|               | anti-sense | 5'-CAGTGGTTCACCGCTTCTTTCA-3'  |
| <i>Pparγ2</i> | sense      | 5'-GATTCTCCTGTTGACCCAGAGCA-3' |
|               | anti-sense | 5'-CATAGGCAGTGCATCAGCGAAG-3'  |
| <i>Creb</i>   | sense      | 5'-ACGGATGGACAGCAGATTCTA-3'   |
|               | anti-sense | 5'-GCTGTGCGAATCTGGTATGTT-3'   |
| <i>C/ebpα</i> | sense      | 5'-AAGCCAAGAAGTCGGTGGACAA-3'  |
|               | anti-sense | 5'-CACGTTGCGTTGTTTGGCTTT-3'   |
| <i>C/ebpβ</i> | sense      | 5'-ATGCAATCCGGATCAAACGTG-3'   |
|               | anti-sense | 5'-CAACCCCGCAGGAACATCTTTA-3'  |
| <i>C/ebpδ</i> | sense      | 5'-GCACGGCCTGTTGTACAGAAAA-3'  |
|               | anti-sense | 5'-CACTTTGGGCAGGGATTTGAA-3'   |
| <i>C/ebpγ</i> | sense      | 5'-AGCATTGTTTGGGGGAGAA-3'     |
|               | anti-sense | 5'-ATGGCCCCATTGGCAGTTATT-3'   |
| <i>C/ebpζ</i> | sense      | 5'-GACATGTTCCAAGCAAGCGATG-3'  |
|               | anti-sense | 5'-AATGAATGGCGGCATCTGTGT-3'   |
| <i>Chrebp</i> | sense      | 5'-CCTGAAGACCCTAAGACCAAGA-3'  |
|               | anti-sense | 5'-TAAGCCATGCACCTTGACAG-3'    |
| <i>Pgclα</i>  | sense      | 5'-GGAATGCACCGTAAATCTGC-3'    |
|               | anti-sense | 5'-CAGGTGTAACGGTAGGTGATGA-3'  |

|                |            |                              |
|----------------|------------|------------------------------|
| <i>Srebp1</i>  | sense      | 5'-GCTGCTTCTAACCTGGCACTAA-3' |
|                | anti-sense | 5'-CCAGTGTTGCCATGGAGATAG-3'  |
| <i>Srebp1α</i> | sense      | 5'-AGTGGCAAAGGAGGCACTAC-3'   |
|                | anti-sense | 5'-GATAGCAGGATGCCAACAGC-3'   |
| <i>Lxra</i>    | sense      | 5'-CGCGACAGTTTTGGTAGAGG-3'   |
|                | anti-sense | 5'-CTCCAGCCACAAGGACATC-3'    |
| <i>Lxrβ</i>    | sense      | 5'-GCTCTGCCTACATCGTGGTC-3'   |
|                | anti-sense | 5'-CTCATGGCCCAGCATCTT-3'     |

S2 Table Primer sets used for ChIP assays.

| Region on the <i>Adipoq</i> gene | Sequence                                         |
|----------------------------------|--------------------------------------------------|
| -5900                            | ATGGCTCAGTGGTTAAGAGCA<br>GATGGTTGTGAGCCTTCATGT   |
| -500                             | TGCATGCATATTTGCACACCAA<br>TCAATTCCCAGCACCCACAGTA |
| -300                             | ATGCCTGAACCACACAGCTTCA<br>AGGGGTCAGGAGACCTCCCTTT |
| -100                             | TTCCCAGACCCAAGCTGGATTA<br>CAACCCAGTCAAGGCCAATAGC |
| 100                              | GGCCACTTTCTCCTCATTCT<br>TTTGGTGTGTCGTCAGATCCACT  |
| 2300                             | TGATTGGGTTGTGCCATTGTG<br>GGCATTGCCCCAATGTGTATGA  |
| 4500                             | TCCCCATGGAAAAGATTGGTG<br>CCGCCATTGCTCTGAGACTTTT  |
| 8800                             | TTCTCTTAATCCTGCCCAGT<br>ATCCAACCTGCACAAGTTCC     |
| over 6000                        | AAAGGAAGGAAGGAAGGAAGG<br>TGAGCTTTGCCCTTTTATGC    |
| Region on the <i>Glut4</i> gene  | Sequence                                         |
| -5000                            | CTGCTACCTTGTGGGACAAA<br>CTCCTGACATGTGCACACAA     |
| -2000                            | ATGGGTAGAGGCAAGAAAG<br>TTCTACCCAGAGTGTTGGGA      |
| -1000                            | AAGGAACTTGAAGGAGGTCC<br>TAACCTACAACCCAGCCCTC     |
| -500                             | AGATGCGTGGAAAGAAAGG<br>GAGATGATCCAAGGGACCAA      |
| 1                                | TTGTGAAGGGCGTGTCTAT<br>AAAGATGCGGAGAGCTGAA       |
| 1000                             | GACCTAAAAGGCTACCCCAA<br>AAGTTCTCTCAGCTTGCTCCA    |
| 2100                             | CTATGCTGGCCAACAATGTC<br>AGGAACCGTCCAAGAATGAG     |
| 5000                             | TACCTCCAGGTTGAAGGAAC<br>AAGAATCACACAGGGGGAAT     |
| over5000                         | AATCAGTGAGGACTCCAACC<br>CCTTCTGGAGTTGCTGCATTA    |
| Region on the <i>Lxra</i> gene   | Sequence                                         |
| -5000                            | CCCCAAGGTATCTGGAGATT<br>GCTTTAGAGCCCACAAAGTG     |
| -2000                            | AGGAAGGAACCCATGAGAA<br>CATAAGGTCATCCCCTCACA      |
| -1000                            | AGGAACTGGGAGTGGACAG<br>TCTTTAAGATGGGGACGATG      |

|          |                                                |
|----------|------------------------------------------------|
| -500     | CCCCTTGGGAGATTAAATCA<br>ATAGCTTTCCTGCCTTGCTTC  |
| 1        | AGTCCTTCTGTCAGAGCAAA<br>TACCAAAACCTGTCGCGTTTC  |
| 1000     | CTGAAGTGTCTGCTGGGTTCAA<br>CCAGGATTAAAGGCATGCAG |
| 2000     | GGGTGTCTTGATATGCAAAG<br>AGCCACAGCTCATGATTCA    |
| 5000     | TGGGGTTCAGGTGCTTATAC<br>GCATCAACTCCTCAGATACT   |
| over5000 | GGCAGCCACAATGTCTTGTT<br>CCCGGCAGCATGTATTTATT   |

(a) 2 days

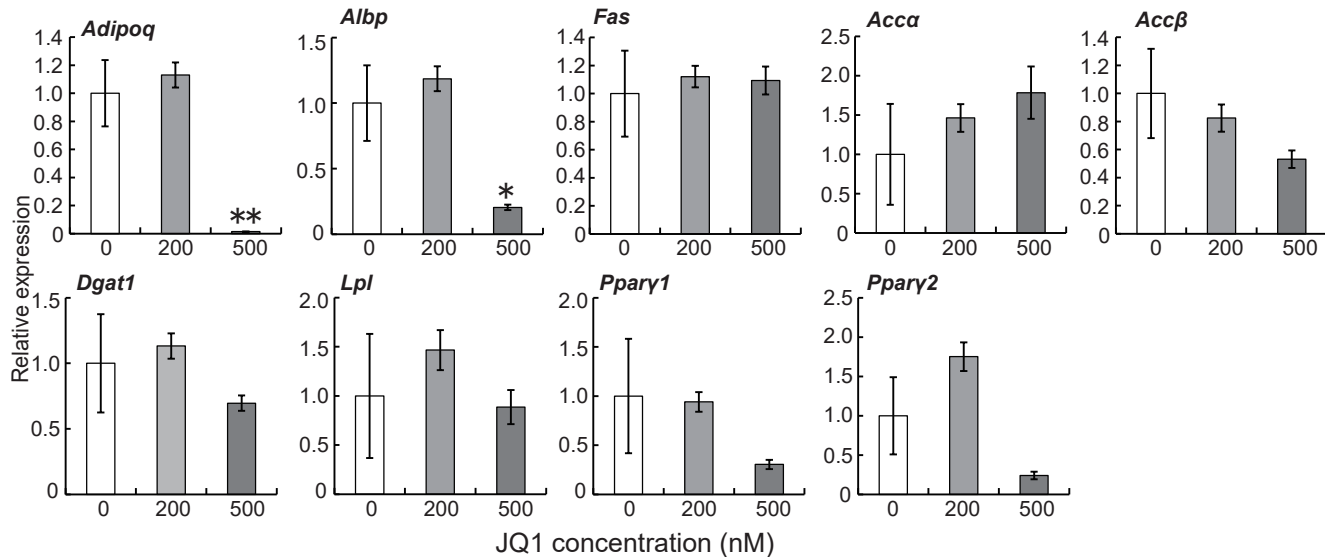

(b) 4 days

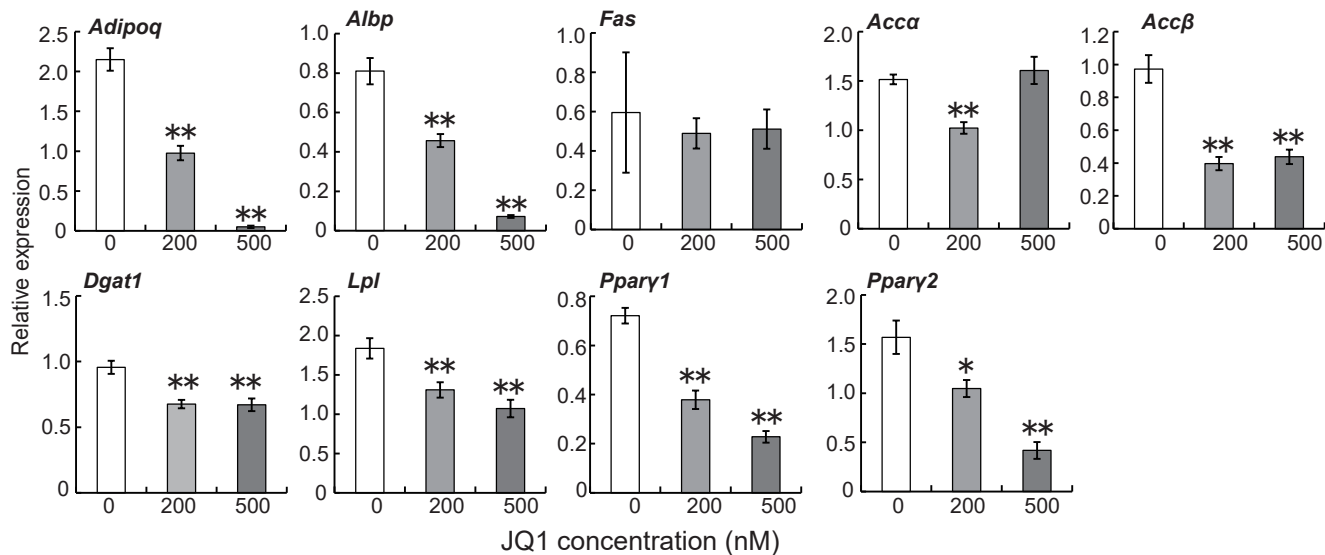

**(a) *Glut4***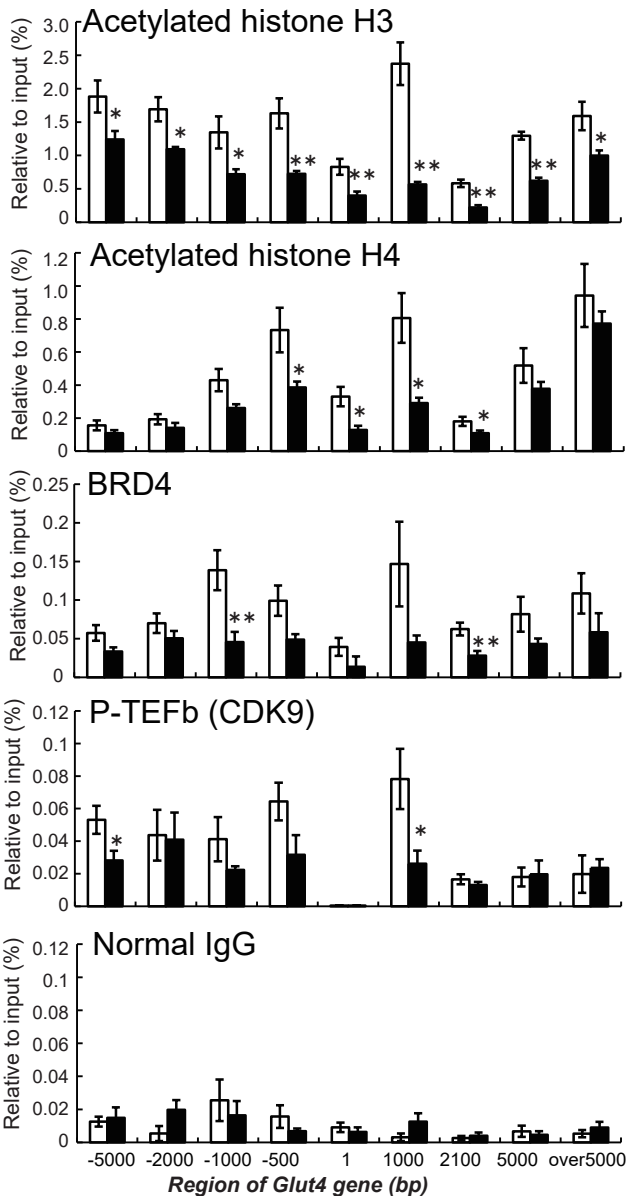**(b) *Lxra***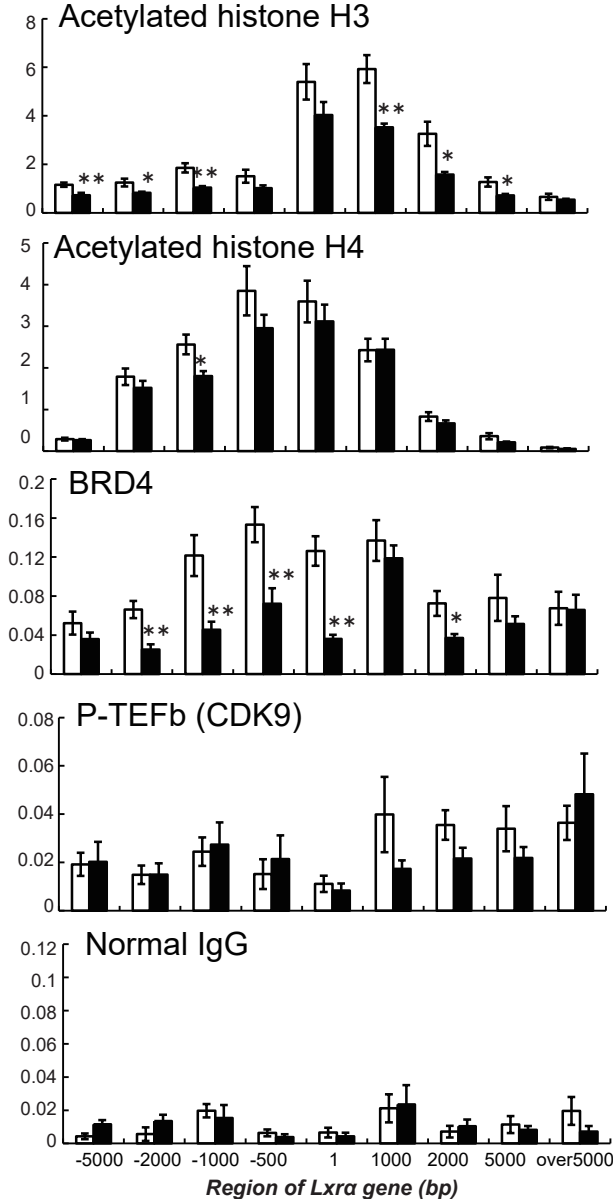

□ Control    ■ BRD4 (-)

S2 Fig

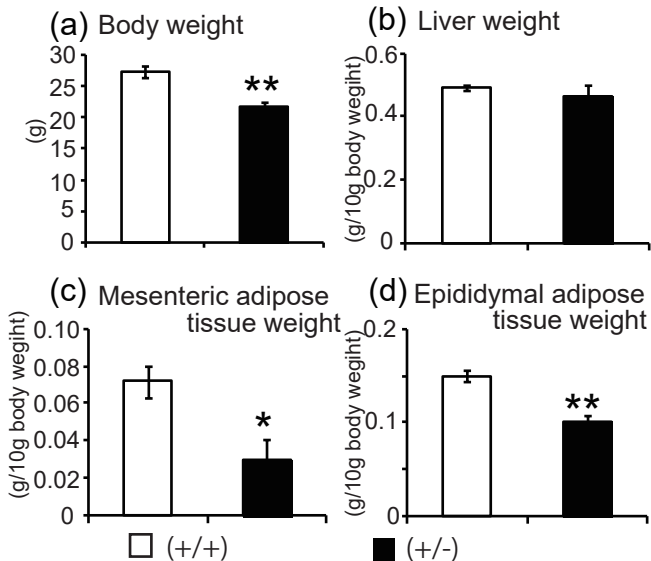

S3 Fig



## Supplementary Figure Legends

**Supplementary Figure S1. Effects of inhibition of the BET family on mRNA levels of genes related to insulin sensitivity in 3T3-L1 adipocytes.** 3T3-L1 adipocytes were treated with (+)-JQ1 for 2 and 4 days after adipocyte differentiation stimulation and mRNA levels of genes related to insulin sensitivity determined. The data shown are means  $\pm$  SEM of six wells per condition in a single experiment. \*  $P < 0.05$ , \*\*  $P < 0.01$  versus the corresponding control cells by Dunnett's test based on analysis of variance.

**Supplementary Figure S2. Effects of BRD4 depletion on the binding of BRD4, acetylated histones H3 and H4, and P-TEFb (CDK9) around *Glut4* and *Lxra* genes in 3T3-L1 adipocytes.** Control or *Brd4* shRNA-expressing 3T3-L1 cells were treated with medium for differentiation. Cells were collected and ChIP assays performed using antibodies against acetylated histone H3, acetylated histone H4, BRD4 and CDK9, and normal IgG as a control, at 2 days after differentiation. (a) *Glut4*. (b) *Lxra*. The data shown are means  $\pm$  SEM of six wells per condition in a single experiment. \*  $P < 0.05$ , \*\*  $P < 0.01$  versus the corresponding control cells by Student's *t*-test.

**Supplementary Figure S3. Weights of body, liver and adipose tissues in 20-week-old wild-type and *Brd4* (+/−) mice.** (a) Body weight. (b) Liver weight. (c) Mesenteric adipose tissue weight. (d) Epididymal adipose tissue weight. The data shown are means  $\pm$  SEM for wild-type mice ( $n = 6$ ) and *Brd4* (+/−) mice ( $n = 3$ ) in a single experiment. \*  $P < 0.05$ , \*\*  $P < 0.01$  versus the corresponding control tissue or cells by Student's *t*-test.
